# Supplementary material
Source: PubMed Central journal article supplement (PMC7165480)
Supplement: pnas.1920244117.sapp.pdf [file pnas.1920244117.sapp.pdf]

## Supporting Information

Crystal structures of cyanobacterial light-dependent protochlorophyllide oxidoreductase

Chen-Song Dong, Wei-Lun Zhang, Qiao Wang, Yu-Shuai Li, Xiao Wang, Min Zhang, and Lin Liu

This Supporting Information includes:

Fig. S1: Purification of *Sy*LPOR and *Te*LPOR.

Fig. S2: Multiple LPOR sequences alignment.

Fig. S3: The proton path within *Sy*LPOR and *Te*LPOR.

Table S1: Constructs information.

Table S2: Data collection and refinement statistics.

Table S3: NADPH environment in *Sy*LPOR and *Te*LPOR.

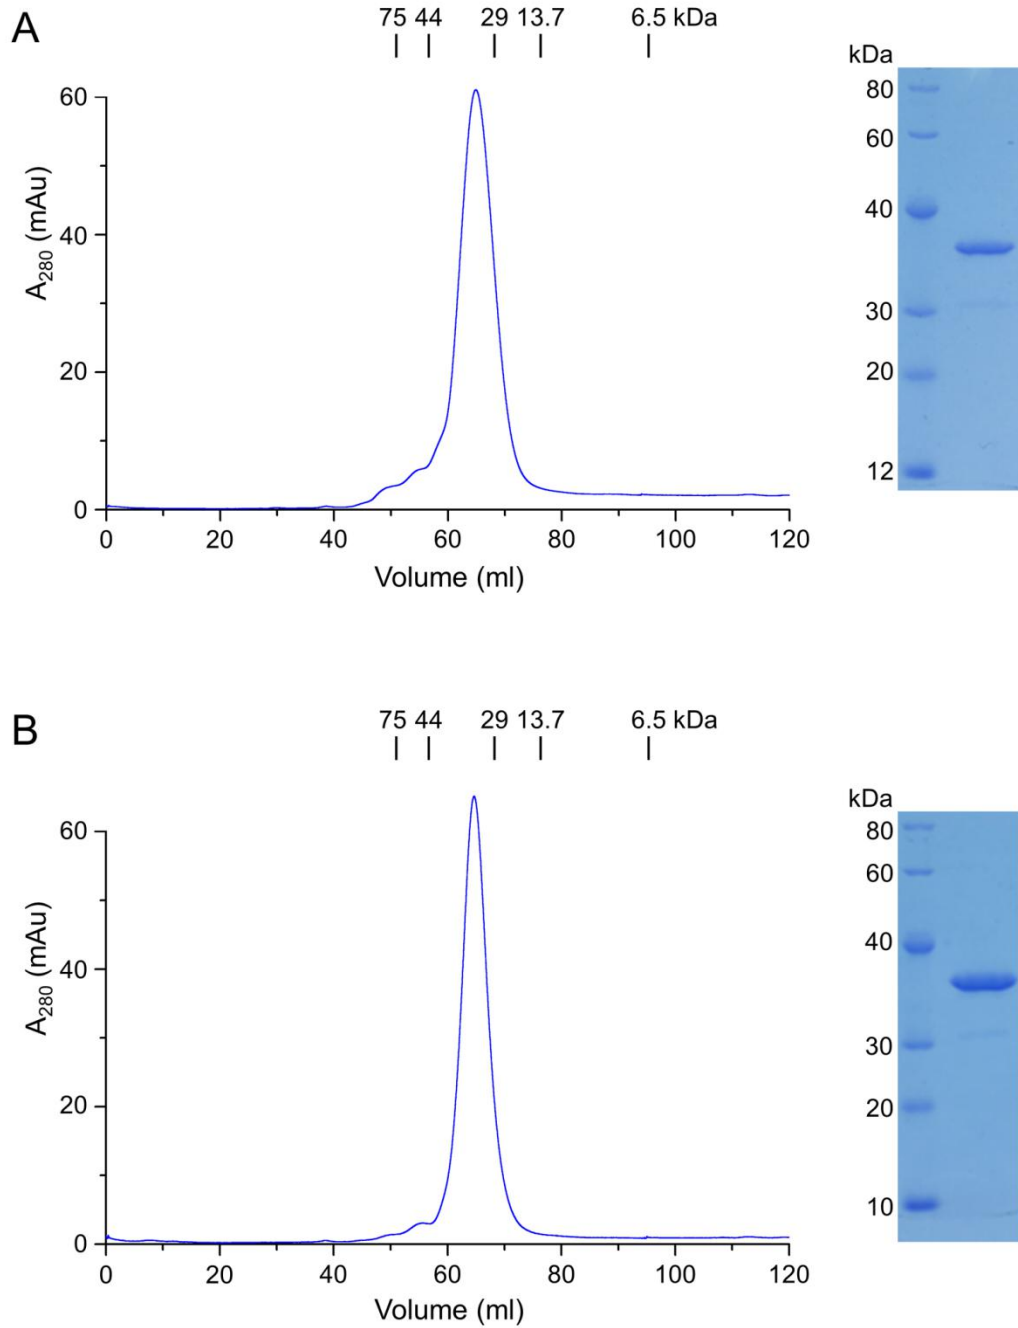

**Fig. S1.** Purification of *Sy*LPOR (A) and *Te*LPOR (B). The SEC profiles on a HiLoad Superdex 75 pg column (GE Healthcare) were recorded as absorbance at 280 nm. The flow rate was 1 ml min<sup>-1</sup>. The molecular weight of protein standards (GE Healthcare) was labeled. The purity of the purified protein (peak fraction) was shown by the SDS-PAGE.

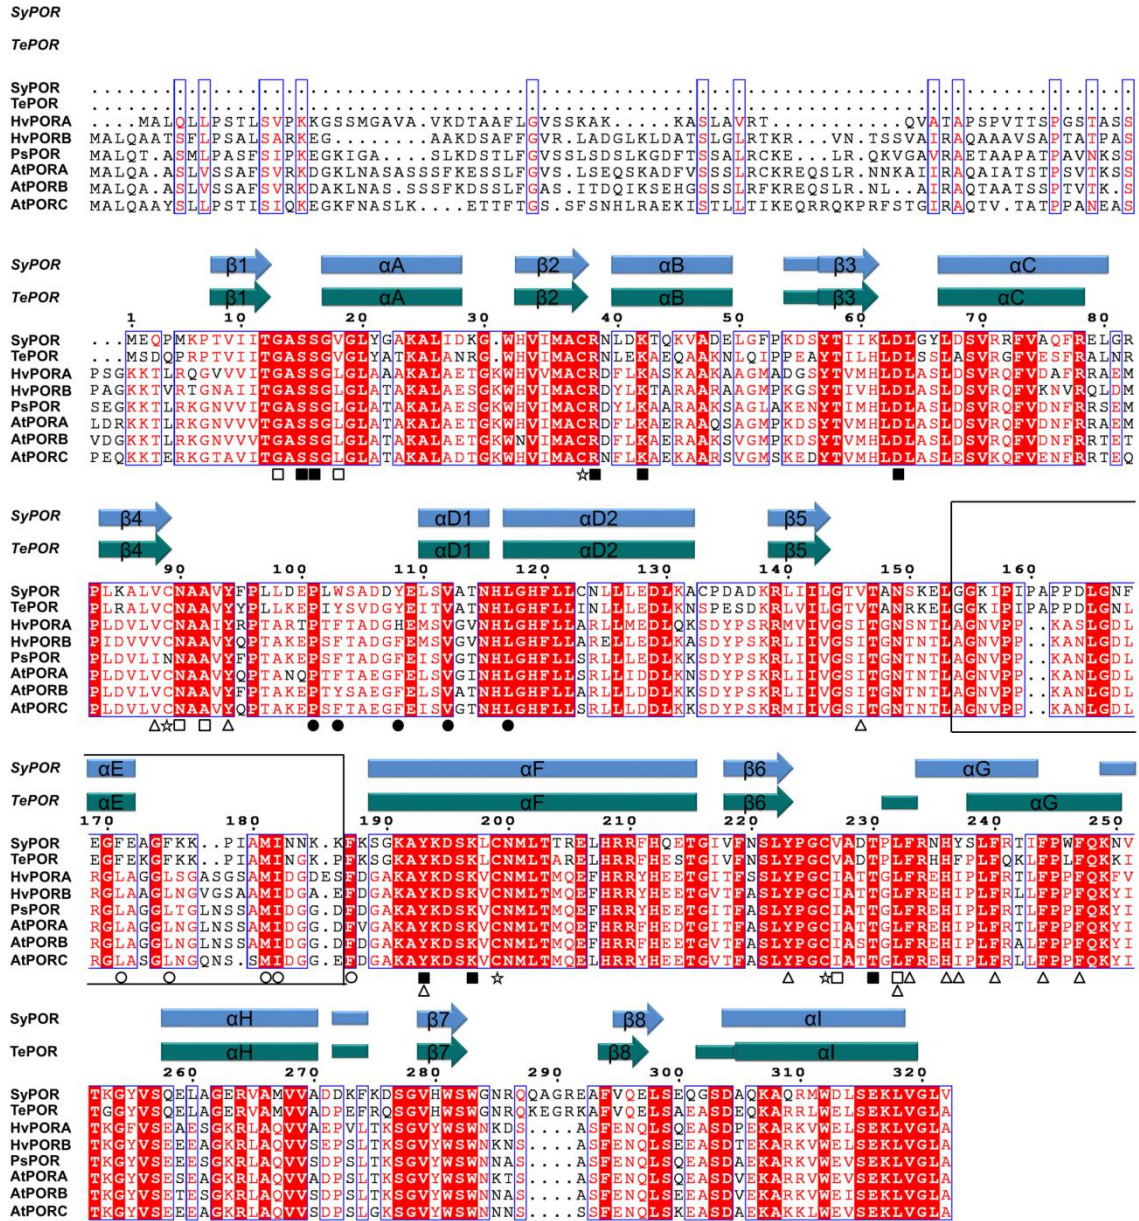

**Fig. S2.** Multiple LPOR sequences alignment. Identical residues are in white on a red background; similar residues are in red and boxed. Dots indicate gaps introduced during alignment. The secondary structure is calculated by DSSP, and labeled as cylinders for  $\alpha$ -helices and arrows for  $\beta$ -strands. The stars denote the four conserved cysteine residues; the rectangles denote residues that interact with NADPH via the side-chain atoms (black) or the backbone atoms (white); the triangles denote residues that possibly participate in Pchlide binding; the circles denote residues that stabilize the LPOR-specific insertion by hydrophobic interactions, with the insertion residues in white and the core residues in black. The 33-residue LPOR-specific insertion is boxed in black rectangle. The abbreviations are: *Sy*, *Synechocystis* sp. PCC 6803; *Te*, *Thermosynechococcus elongates*; *At*, *Arabidopsis thaliana*; *Ps*, *Pisum sativum* L.; *Hv*, *Hordeum vulgare*. The alignment is generated with Clustal Omega (<https://www.ebi.ac.uk/Tools/msa/clustalo/>) and colored with ESPript 3.0 (<http://esript.ibcp.fr/ESPript/ESPript/index.php>).

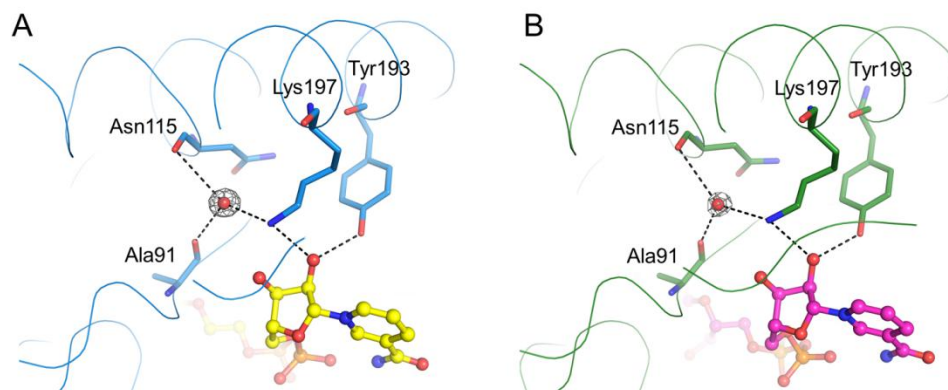

**Fig. S3.** The proton path within *SyLPOR* (A) and *TeLPOR* (B). The  $2F_o - F_c$  electron density map of the water molecule (*red* sphere) bound to Ala91, Asn115, and Lys197 was contoured at 1.0  $\sigma$  level.

**Table S1.** Constructs information.

|                                                         |                                                                                                                                                                                                                                                                                                                                                                                                                           |                                                                                                                                                                                                                                                                                                                                                                                                             |
|---------------------------------------------------------|---------------------------------------------------------------------------------------------------------------------------------------------------------------------------------------------------------------------------------------------------------------------------------------------------------------------------------------------------------------------------------------------------------------------------|-------------------------------------------------------------------------------------------------------------------------------------------------------------------------------------------------------------------------------------------------------------------------------------------------------------------------------------------------------------------------------------------------------------|
| Source organism                                         | <i>Synechocystis</i> sp. PCC 6803                                                                                                                                                                                                                                                                                                                                                                                         | <i>Thermosynechococcus elongatus</i>                                                                                                                                                                                                                                                                                                                                                                        |
| DNA source                                              | Synthesized DNA                                                                                                                                                                                                                                                                                                                                                                                                           | Synthesized DNA                                                                                                                                                                                                                                                                                                                                                                                             |
| Forward primer*                                         | GGAATTCC <u>CATATG</u> GAACAGCC<br>GATGAAACC                                                                                                                                                                                                                                                                                                                                                                              | GGAATTCC <u>CATATG</u> AGTGACCA<br>GCCGCGCCCGA                                                                                                                                                                                                                                                                                                                                                              |
| Reverse primer                                          | GAT <u>CTCGAG</u> TAAACCAGACC<br>AACCAGTTTTTCGC                                                                                                                                                                                                                                                                                                                                                                           | GAT <u>CTCGAG</u> CGCCAGGCCAA<br>CCAGTTTTTC                                                                                                                                                                                                                                                                                                                                                                 |
| Cloning vector                                          | pUC57                                                                                                                                                                                                                                                                                                                                                                                                                     | pUC57                                                                                                                                                                                                                                                                                                                                                                                                       |
| Expression vector                                       | pET-28a(+)                                                                                                                                                                                                                                                                                                                                                                                                                | pET-22b(+)                                                                                                                                                                                                                                                                                                                                                                                                  |
| Expression host                                         | <i>Escherichia coli</i> BL21(DE3)                                                                                                                                                                                                                                                                                                                                                                                         | <i>Escherichia coli</i> BL21(DE3)                                                                                                                                                                                                                                                                                                                                                                           |
| Complete amino acid sequence of the construct produced† | <u>MGSSHHHHHSSGLVPRGSH</u><br>MEQPMKPTVIITGASSGVGLY<br>GAKALIDKGWHVIMACRNLD<br>KTQKVADELGFPKDSYTIKLD<br>LGYLDSVRRFVAQFRELGRPL<br>KALVCNAAVYFPLLDEPLWSA<br>DDYELSVATNHLGHFLLCNLL<br>LEDLKACPDADKRLIILGTVTA<br>NSKELGGKIPIAPPDLGNFEGF<br>EAGFKKPIAMINNKFKSGKA<br>YKDSKLCNMLTTRELHRRFHQ<br>ETGIVFNSLYPGCVADTPLFRN<br>HYSLFRITFPWFQKNVTKGYV<br>SQELAGERVAMVVADDKFKD<br>SGVHWSWGNRQQAGREAFVQ<br>ELSEQGSDAQKAQRMWDLSE<br>KLVGLV | MSDQPRPTVIITGASSGVGLYA<br>TKALANRGWHVIMACRNLEK<br>AEQAAKNLQIPPEAYTILHLDL<br>SSLASVRGFVESFRALNRPLRA<br>LVCNAAVYYPPLLKEPIYSVDG<br>YEITVATNHLGHFLLINLLED<br>LKNSPESDKRLVILGTVTANRK<br>ELGGKIPIAPPDLGNLEGFEK<br>GFKKPIAMINGKPFKSGKAYK<br>DSKLCNMLTARELHRRFHST<br>GIVFNSLYPGCVADTPLFRHHF<br>PLFQKLFPLFQKKITGGYVSQE<br>LAGERVAMVVADPEFRQSGV<br>HWSWGNRQKEGRKAFVQELS<br>AEASDEQKARRLWELSEKLVG<br><u>LALEHHHHHH</u> |

\*The restriction site is italicized and underlined.

†Extra amino acids generated during construction are underlined.

**Table S2.** Data collection and refinement statistics.

|                                                      | SyLPOR–NADPH           | TeLPOR–NADPH           |
|------------------------------------------------------|------------------------|------------------------|
| Diffraction Data                                     |                        |                        |
| Diffraction source                                   | BL18U1, SSRF           | BL17U1, SSRF           |
| Detector                                             | Pilatus3 6M            | Eiger X 16M            |
| Wavelength (Å)                                       | 0.979                  | 0.979                  |
| Unit-cell parameters                                 |                        |                        |
| <i>a</i> , <i>b</i> , <i>c</i> (Å)                   | 156.0, 57.1, 72.9      | 52.9, 96.2, 141.7      |
| $\alpha$ , $\beta$ , $\gamma$ (°)                    | 90, 90, 90             | 90, 90, 90             |
| Space group                                          | P 21 21 2              | P 21 21 21             |
| Resolution (Å)                                       | 50-2.20 (2.28-2.20)*   | 50-2.40 (2.49-2.40)    |
| Total No. of reflections                             | 163488 (16060)         | 305028 (22810)         |
| No. of unique reflections                            | 33980 (3338)           | 27727 (2401)           |
| Average redundancy                                   | 4.8 (4.9)              | 11.0 (9.5)             |
| Mean <i>I</i> / $\sigma I$                           | 15.2 (2.2)             | 18.1 (4.5)             |
| Completeness (%)                                     | 99.9 (99.9)            | 96.9 (85.9)            |
| Wilson B-factor (Å <sup>2</sup> )                    | 37.26                  | 43.01                  |
| <i>R</i> <sub>merge</sub>                            | 0.107 (0.874)          | 0.112 (0.547)          |
| <i>R</i> <sub>pim</sub>                              | 0.052 (0.428)          | 0.036 (0.183)          |
| CC <sub>1/2</sub>                                    | 0.990 (0.686)          | 0.988 (0.913)          |
| Refinement                                           |                        |                        |
| Resolution range (Å)                                 | 46.09-2.20 (2.26-2.20) | 49.57-2.40 (2.51-2.40) |
| No. of reflections used in refinement                | 33794 (3279)           | 27674 (2275)           |
| No. of reflections used for <i>R</i> <sub>free</sub> | 1710 (173)             | 1329 (126)             |
| <i>R</i> <sub>work</sub>                             | 0.179 (0.256)          | 0.181 (0.244)          |
| <i>R</i> <sub>free</sub>                             | 0.207 (0.289)          | 0.221 (0.292)          |
| No. of non-hydrogen atoms                            |                        |                        |
| protein                                              | 4620                   | 4730                   |
| ligand                                               | 116                    | 96                     |
| water                                                | 211                    | 186                    |
| Average <i>B</i> factor (Å <sup>2</sup> )            |                        |                        |
| protein                                              | 43.81                  | 39.78                  |
| ligand                                               | 39.68                  | 33.04                  |
| water                                                | 50.58                  | 40.86                  |
| Model quality                                        |                        |                        |
| RMS bond lengths (Å)                                 | 0.004                  | 0.004                  |
| RMS bond angles (°)                                  | 0.73                   | 0.79                   |
| Ramachandran plot                                    |                        |                        |
| favored (%)                                          | 98.10                  | 97.99                  |
| allowed (%)                                          | 1.90                   | 2.01                   |
| PDB code                                             | 6L1G                   | 6L1H                   |

\*Values in parentheses are for highest resolution shell.

**Table S3.** NADPH environment in *SyLPOR* and *TeLPOR*.

| Bonding atom                 | NADPH atom     |        | Distance (Å) in chain A/B |               |
|------------------------------|----------------|--------|---------------------------|---------------|
|                              | PDB V3 (IUPAC) | PDB V2 | <i>SyLPOR</i>             | <i>TeLPOR</i> |
| Water1 O                     | O7N            | NO7    | 2.63/2.61                 | 3.01/2.41     |
| Water2 O                     | O2N            | NO2    | 2.44/2.44                 | 2.61/2.50     |
|                              | O5B            | AO5*   | 2.85/3.01                 | 2.94/2.78     |
| Water3 O                     | O1A            | AO1    | 2.84/3.30                 | 2.83/2.52     |
| Water4 O                     | O1A            | AO1    | 2.92/3.58                 | –             |
|                              | O3X            | AOP3   | 3.11/3.02                 | –             |
| Water5 O                     | O3X            | AOP3   | 3.06/3.99                 | 2.72/2.73     |
| Water6 O                     | O2X            | AOP2   | 2.61/2.54                 | 2.69/2.72     |
| Water7 O                     | O2X            | AOP2   | 2.78/2.81                 | 2.47/2.69     |
| Water8 O                     | O2B            | AO2*   | 2.99/2.95                 | 3.19/–        |
|                              | N3A            | AN3    | 2.92/2.82                 | 2.76/–        |
| Water9 O                     | N6A            | AN6    | 2.95/2.99                 | 2.79/3.15     |
| Gly13 backbone C=O           | O3B            | AO3*   | 3.21/3.23                 | 3.05/2.96     |
| Ser15 $\gamma$ O             | O3B            | AO3*   | 3.08/3.05                 | 3.08/2.82     |
| Ser15 $\gamma$ O             | O1X            | AOP1   | 2.52/2.92                 | –             |
| Ser16 $\gamma$ O             | O2A            | AO2    | 2.89/2.96                 | 2.85/2.75     |
| Val18 backbone N             | O2N            | NO2    | 2.93/2.81                 | 2.89/2.84     |
| Arg38 $\eta$ N               | O3X            | AOP3   | 3.00/2.62                 | 2.71/2.75     |
| Arg38 $\epsilon$ N           | O2X            | AOP2   | 2.80/4.07                 | 2.90/4.12     |
| Lys42 $\zeta$ N              | O1X            | AOP1   | 2.96/2.77                 | 2.79/2.77     |
| Asp63 $\delta$ O             | N6A            | AN6    | 3.43/3.29                 | 3.22/3.10     |
| Asn90 backbone C=O           | O3D            | NO3*   | 2.68/2.72                 | 2.56/2.56     |
| Ala92 backbone N             | O4B            | AO4*   | 3.43/3.29                 | 3.15/3.07     |
| Tyr193 $\eta$ O              | O2D            | NO2*   | 2.68/2.72                 | 2.70/2.64     |
| Lys197 $\zeta$ N             | O2D            | NO2*   | 3.05/3.05                 | 3.18/3.03     |
| Lys197 $\zeta$ N             | O3D            | NO3*   | 2.95/3.01                 | 3.12/3.03     |
| Val227 backbone N            | O7N            | NO7    | 2.99/2.93                 | 2.75/3.08     |
| Thr230 $\gamma$ O            | O1N            | NO1    | 2.64/2.52                 | 2.74/2.77     |
| Leu232 backbone N            | O3             | O3     | –                         | 3.13/3.15     |
| Arg234 $\eta$ N <sub>1</sub> | O1X            | AOP1   | –                         | 2.86/2.96     |
| Arg234 $\eta$ N <sub>2</sub> | O1A            | AO1    | –                         | 2.87/2.93     |
